# Supplementary material for: Chemical Analysis and Investigation of Antimicrobial and Antibiofilm Activities of Prangos trifida (Apiaceae)
Source: MDPI journal article supplement (doi:10.3390/antibiotics13010041), 2024-01-01
Supplement: s1 [file s1]

**A**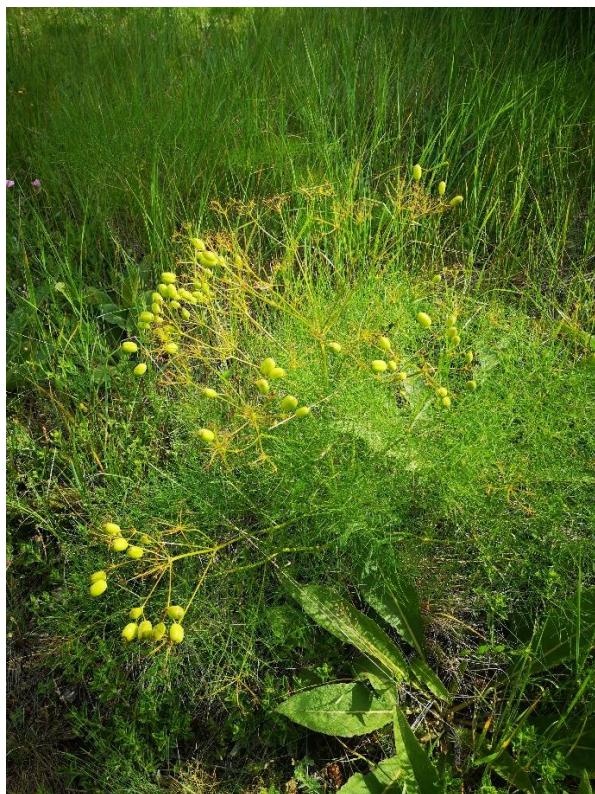**B**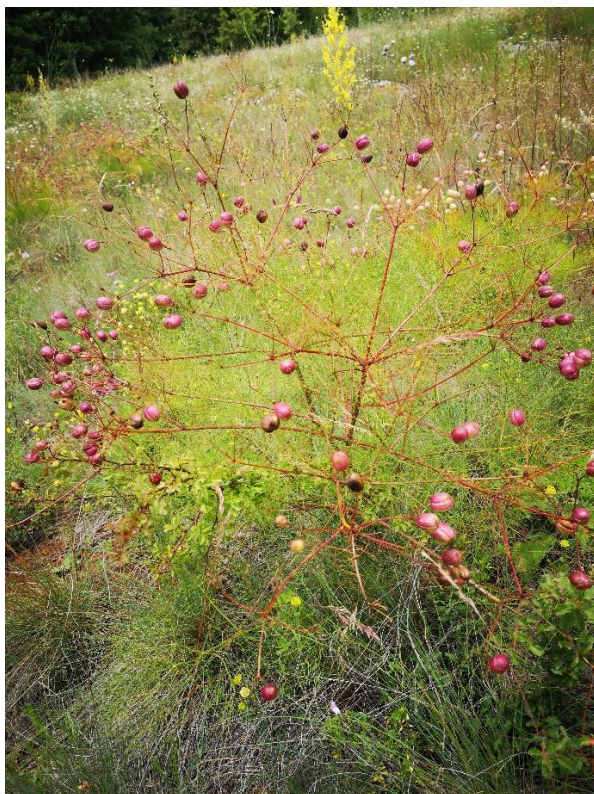**C**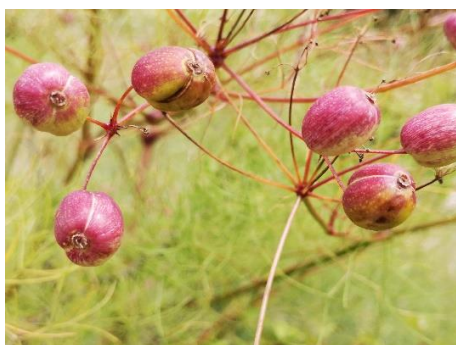**D**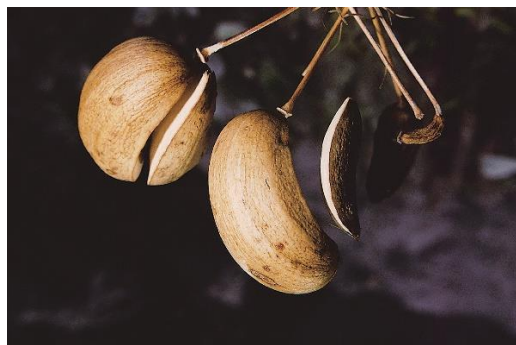**E**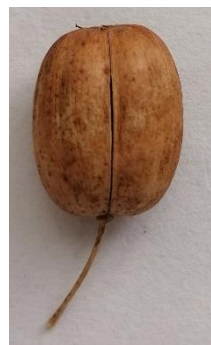**F**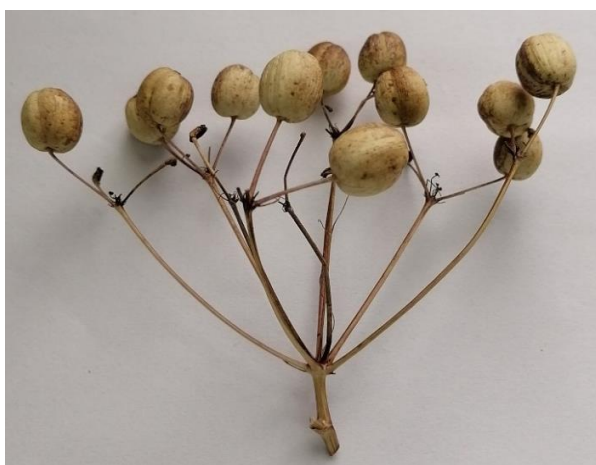**G**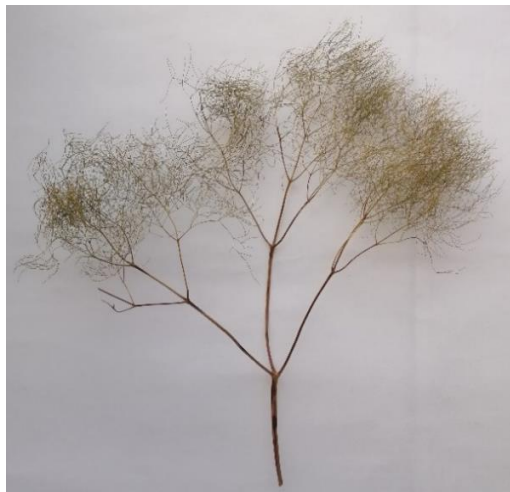

**Figure S1.** *Prangos trifida* aerial parts in fruit (A and B), fruits (C-F) and dried leaf (G). Sićevo Gorge (Kusača), Serbia (2020).
