# Supplementary material for: Chemical Analysis and Investigation of Antimicrobial and Antibiofilm Activities of Prangos trifida (Apiaceae)
Source: MDPI journal article supplement (doi:10.3390/antibiotics13010041), 2024-01-01
Supplement: s1 [file s1]

**Table S1.** Regression equations,  $r^2$ , limits of detection (LOD) and quantification (LOQ) of the compounds.

| Compound                        | Regression equation            | $r^2$  | LOD, $\mu\text{g}$ | LOQ, $\mu\text{g}$ |
|---------------------------------|--------------------------------|--------|--------------------|--------------------|
| Imperatorin (7) <sup>1</sup>    | $y=14013.0048x+39.9148$        | 0.9998 | 0.0281             | 0.0853             |
| Imperatorin (7) <sup>2</sup>    | $y=4\text{E}+08x+4\text{E}+06$ | 0.9938 | 0.1101             | 0.3337             |
| Oxypeucedanin (6) <sup>1</sup>  | $y=3354.0961x+2.3841$          | 0.9996 | 0.0833             | 0.2525             |
| Prantschimgin (10) <sup>3</sup> | $y=4271.7028x+269.9534$        | 0.9987 | 0.1646             | 0.4988             |

<sup>1</sup> Obtained using peak areas recorded on DAD at 250 nm. <sup>2</sup> Obtained using peak areas recorded on MSD in Single Ion Monitoring (SIM) of  $m/z$  271.1 mode. <sup>3</sup> Obtained using peak areas recorded on DAD at 350 nm.
